# Supplementary material
Source: PubMed Central journal article supplement (PMC5963539)
Supplement: NIHMS957866-supplement-1.pdf [file NIHMS957866-supplement-1.pdf]

## Supplemental Material

**Table S1. Expression vector sequences\***

| Httex1 25Q - MBP Fusion Protein (bacterial) |            |             |            |             |
|---------------------------------------------|------------|-------------|------------|-------------|
| MGSSHHHHHH                                  | GSSMKIEEGK | LVIWINGDKG  | YNGLAEVGKK | FEKDTGIKVT  |
| VEHPDKLEEK                                  | FPQVAATGDG | PDIIFWAHDR  | FGGYAQSGLL | AEITPDKAFQ  |
| DKLYPFTWDA                                  | VRYNGKLIAY | PIAVEALSLI  | YNKDLLPNPP | KTWEEIPALD  |
| KELKAKGKSA                                  | LMFNLQEPYF | TWPLIAADGG  | YAFKYENGGY | DIKDVGVDNA  |
| GAKAGLTFLV                                  | DLIKNKHMNA | DTDYSIAEAA  | FNKGETAMTI | NGPWAWSNID  |
| TSKVNYGVTV                                  | LPTFKGQPSK | PFVGVLSAGI  | NAASPNKELA | KEFLENYLLT  |
| DEGLEAVNKD                                  | KPLGAVALKS | YEEELAKDPR  | IAATMENAQK | GEIMPNI PQM |
| SAFWYAVRTA                                  | VINAASGRQT | VDEALKDAQT  | NSSSNNNNNN | NNNNLGIEEN  |
| LYFQGHMATL                                  | EKLMKAFESL | KSFQQQQQQQ  | QQQQQQQQQQ | QQQQQQQQPP  |
| PPPPPPPPPP                                  | LPQPPPPQAP | LLPQPQPPPP  | PPPPPPGPAV | AEEPLHRPKK  |
| W                                           |            |             |            |             |
| Httex1 46Q - MBP Fusion Protein (bacterial) |            |             |            |             |
| MGSSHHHHHH                                  | GSSMKIEEGK | LVIWINGDKG  | YNGLAEVGKK | FEKDTGIKVT  |
| VEHPDKLEEK                                  | FPQVAATGDG | PDIIFWAHDR  | FGGYAQSGLL | AEITPDKAFQ  |
| DKLYPFTWDA                                  | VRYNGKLIAY | PIAVEALSLI  | YNKDLLPNPP | KTWEEIPALD  |
| KELKAKGKSA                                  | LMFNLQEPYF | TWPLIAADGG  | YAFKYENGGY | DIKDVGVDNA  |
| GAKAGLTFLV                                  | DLIKNKHMNA | DTDYSIAEAA  | FNKGETAMTI | NGPWAWSNID  |
| TSKVNYGVTV                                  | LPTFKGQPSK | PFVGVLSAGI  | NAASPNKELA | KEFLENYLLT  |
| DEGLEAVNKD                                  | KPLGAVALKS | YEEELAKDPR  | IAATMENAQK | GEIMPNI PQM |
| SAFWYAVRTA                                  | VINAASGRQT | VDEALKDAQT  | NSSSNNNNNN | NNNNLGIEEN  |
| LYFQGHMATL                                  | EKLMKAFESL | KSFQQQQQQQ  | QQQQQQQQQQ | QQQQQQQQQQ  |
| QQQQQQQQQQ                                  | QQQQQQQQQP | PPPPPPPPPP  | QLPQPPPPAQ | PLLPQPQPPP  |
| PPPPPPPPGA                                  | VAEEPLHRPK | KW          |            |             |
| pTRES Httex1 25Q - EmGFP (mammalian)        |            |             |            |             |
| MATLEKLMKA                                  | FESLKSFQQQ | QQQQQQQQQQ  | QQQQQQQQQQ | QQPPPPPPPP  |
| PPPQLPQPPP                                  | QAQPLLPPQ  | PPPPPPPPPP  | GPAVAEEPLH | RPGSLVSKGE  |
| ELFTGVVPIL                                  | VELDGDVNGH | KFSVSGEGEG  | DATYGKLTLL | FICTTGKLPV  |
| PWPTLVTTTL                                  | YGVQCFARYP | DHMKQHDFFK  | SAMPEGYVQE | RTIFFKDDGN  |
| YKTRAEVKFE                                  | GDTLVNRIEL | KGIDFKEDGN  | ILGHKLEYNY | NSHKVYITAD  |
| KQKNGIKVNF                                  | KTRHNIEDGS | VQLADHYQQN  | TPIGDGPVLL | PDNHYLSTQS  |
| KLSKDPNEKR                                  | DHMLLEFVT  | AAGITLGMDE  | LYK        |             |
| pTRES Httex1 46Q - EmGFP (mammalian)        |            |             |            |             |
| MATLEKLMKA                                  | FESLKSFQQQ | QQQQQQQQQQ  | QQQQQQQQQQ | QQQQQQQQQQ  |
| QQQQQQQQQQ                                  | QQPPPPPPPP | PPPPQLPQPP  | PQAQPLLPPQ | QPPPPPPPPPP |
| GPAVAEEPLH                                  | HRPGSLVSKG | EELFTGVVPI  | LVELDGDVNG | HKFSVSGEGE  |
| GDATYGKLTLL                                 | KFICTTGKLP | VPWPTLVTTTL | TYGVQCFARY | PDHMKQHDFK  |
| KSAMPEGYVQ                                  | ERTIFFKDDG | NYKTRAEVKF  | EGDTLVNRIE | LKGIDFKEDG  |
| NILGHKLEYN                                  | YNSHKVYITA | DKQKNGIKVN  | FKTRHNIEDG | SVQLADHYQQ  |
| NTPIGDGPVL                                  | LPDNHYLSTQ | SKLSKDPNEK  | RDHMLLEFV  | TAAGITLGMDE |
| ELYK                                        |            |             |            |             |

| pTREX - EmGFP (mammalian)                 |            |             |            |             |
|-------------------------------------------|------------|-------------|------------|-------------|
| MLVSKGEELF                                | TGVVPILVEL | DGDVNGHKFS  | VSGEGEGDAT | YGKLTLLKFC  |
| TTGKLPVWP                                 | TLVTTLTG   | QCFARYPDHM  | KQHDFFKSAM | PEGYVQERTI  |
| FFKDDGNYKT                                | RAEVKFEGDT | LVNRIELKGI  | DFKEDGNILG | HKLEYNYNSH  |
| KVYITADKQK                                | NGIKVNFKTR | HNIEDGSVQL  | ADHYQQNTPI | GDGPVLLPDN  |
| HYLSTQSKLS                                | KDPNEKRDHM | VLLEFVTAAG  | ITLGMDELYK |             |
| pTREX Httex1 25Q - mCherry (mammalian)    |            |             |            |             |
| MATLEKLMKA                                | FESLKSFQQQ | QQQQQQQQQQ  | QQQQQQQQQQ | QQPPPPPPPP  |
| PPPQLPQPP                                 | QAQPLLPQP  | PPPPPPPPPP  | GPAVAEEPLH | RPGSVSKGEE  |
| DNMAIIKEFM                                | RFKVHMEGSV | NGHEFEIEGE  | GEGRPYEGTQ | TAKLKVTKGG  |
| PLPFAWDILS                                | PQFMYGSKAY | VKHPADIPDY  | LKLSFPEGFK | WERVMNFEDG  |
| GVVTVTQDSS                                | LQDGEFIYKV | KLRGTNFPSP  | GPVMQKKTMG | WEASSERMYP  |
| EDGALKGEIK                                | QRLKLDGGH  | YDAEVKTTYK  | AKKPVQLPGA | YNVNIKLDIT  |
| SHNEDYTIVE                                | QYERAEGRHS | TGGMDELYK   |            |             |
| pTREX Httex1 46Q - mCherry (mammalian)    |            |             |            |             |
| MATLEKLMKA                                | FESLKSFQQQ | QQQQQQQQQQ  | QQQQQQQQQQ | QQQQQQQQQQ  |
| QQQQQQQQQQ                                | QQPPPPPPPP | PPPPQLPQPP  | PQAQPLLPQP | QPPPPPPPPPP |
| PGPAVAEEPL                                | HRPGSVSKGE | EDNMAIIKEF  | MRFKVHMEGS | VNGHEFEIEG  |
| EGEGRPYEGT                                | QTAKLKVTKG | GPLPFAWDIL  | SPQFMYGSKA | YVKHPADIPD  |
| YLKLSFPEGF                                | KWERVMNFED | GGVVTVTQDS  | SLQDGEFIYK | VKLRGTNFPSP |
| DGPVMQKKT                                 | GWEASSERMY | PEDGALKGEI  | KQRLKLDGG  | HYDAEVKTTY  |
| KAKKPVQLPG                                | AYNVNIKLDI | TSHNEDYTIV  | EQYERAEGRH | STGGMDELYK  |
| pEGFP-C1 - mCherry (mammalian)            |            |             |            |             |
| MVSKGEEDNM                                | AIIEKFMRFK | VHMEGSVNGH  | EFEIEGEGEG | RPYEGTQTAK  |
| LKVTKGGPLP                                | FAWDILSPQF | MYGSKAYVKH  | PADIPDYLKL | SFPEGFKWER  |
| VMNFEDGGVV                                | TVTQDSSLQD | GEFIYKVKLR  | GTNFPSDGPV | MQKKTMGWEA  |
| SSERMYPEDG                                | ALKGEIKQRL | KLKLDGGHYDA | EVKTTYKAKK | PVQLPGAYNV  |
| NIKLDITSHN                                | EDYTIVEQYE | RAEGRHSTGG  | MDELYK     |             |
| pTREX GFP <sup>inv</sup> Y66L (mammalian) |            |             |            |             |
| MLVSKGEELF                                | TGVVPILVEL | DGDVNGHKFS  | VSGEGEGDAT | YGKLTLLKFC  |
| TTGKLPVWP                                 | TLVTTTLG   | QCFARYPDHM  | KQHDFFKSAM | PEGYVQERTI  |
| FFKDDGNYKT                                | RAEVKFEGDT | LVNRIELKGI  | DFKEDGNILG | HKLEYNYNSH  |
| KVYITADKQK                                | NGIKVNFKTR | HNIEDGSVQL  | ADHYQQNTPI | GDGPVLLPDN  |
| HYLSTQSKLS                                | KDPNEKRDHM | VLLEFVTAAG  | ITLGMDELYK |             |

\* Sequences are color coded as follows: 6 × Histidine tag; Maltose binding protein; TEV protease recognition sequence; Huntingtin; Fluorescent protein

**Table S2.** Backbone assignments for Httex1 Q25. \* indicates glutamines within polyQ that are sequentially indistinguishable.

| Assignment | <sup>15</sup> N | <sup>1</sup> H |
|------------|-----------------|----------------|
| H02N-H     | 118.245         | 8.918          |
| M03N-H     | 122.906         | 8.714          |
| A04N-H     | 126.282         | 8.590          |
| T05N-H     | 114.848         | 8.218          |
| L06N-H     | 124.242         | 8.348          |
| K08N-H     | 120.566         | 8.334          |
| L09N-H     | 122.014         | 8.271          |
| M10N-H     | 121.389         | 8.357          |
| K11N-H     | 121.758         | 8.260          |
| A12N-H     | 124.111         | 8.205          |
| F13N-H     | 119.419         | 8.203          |
| E14N-H     | 121.375         | 8.238          |
| S15N-H     | 116.620         | 8.295          |
| K17N-H     | 122.483         | 8.184          |
| S18N-H     | 116.136         | 8.260          |
| F19N-H     | 123.000         | 8.338          |
| Q20N-H     | 119.958         | 8.455          |
| Q21N-H     | 120.074         | 8.247          |
| Q22N-H     | 120.354         | 8.278          |
| Q23N-H     | 121.430         | 8.453          |
| Q24N-H     | 121.207         | 8.427          |
| QxN-H*     | 120.734         | 8.251          |
| QxN-H*     | 120.665         | 8.352          |
| QxN-H*     | 120.741         | 8.369          |
| QxN-H*     | 121.086         | 8.416          |

| Assignment | <sup>15</sup> N | <sup>1</sup> H |
|------------|-----------------|----------------|
| QxN-H*     | 121.890         | 8.497          |
| Q43N-H     | 120.854         | 8.385          |
| Q44N-H     | 121.123         | 8.357          |
| Q56N-H     | 120.341         | 8.398          |
| L57N-H     | 123.383         | 8.568          |
| Q63N-H     | 120.843         | 8.539          |
| A64N-H     | 126.267         | 8.512          |
| L67N-H     | 122.760         | 8.446          |
| L68N-H     | 125.129         | 8.337          |
| Q70N-H     | 122.245         | 8.621          |
| Q72N-H     | 122.079         | 8.576          |
| G83N-H     | 109.285         | 8.344          |
| A85N-H     | 124.566         | 8.499          |
| V86N-H     | 120.350         | 8.211          |
| A87N-H     | 128.156         | 8.469          |
| E88N-H     | 121.195         | 8.496          |
| E89N-H     | 123.695         | 8.491          |
| L91N-H     | 126.013         | 8.507          |
| H92N-H     | 118.793         | 8.539          |
| R93N-H     | 123.802         | 8.446          |
| K95N-H     | 122.293         | 8.471          |
| K96N-H     | 123.607         | 8.254          |
| W97N-H     | 127.594         | 7.850          |
| W97-Indole | 128.853         | 10.107         |

|                              | $\chi^2_{CA}$ | $\chi^2_{CB}$ | $\chi^2_{CO}$ | $\chi^2_N$ | $\chi^2_H$ |
|------------------------------|---------------|---------------|---------------|------------|------------|
| All residues                 | 4.48          | 0.84          | 1.21          | 0.68       | 0.30       |
| Z-score  $\leq$ 1            | 1.45          | 0.40          | 1.06          | 0.68       | 0.30       |
| Z-score  $\leq$ 1, no C-term | 0.81          | 0.38          | 1.01          | 0.53       | 0.28       |

**Table S3:** Quantifies the quality of agreement between the simulation average and experimental data,  $\chi^2_{\delta}$ , for each chemical shift type,  $\delta$ . Here,  $\chi^2_{\delta} = \frac{1}{N} \sum_{i=1}^N \frac{(\langle \delta_{i,sim} \rangle - \delta_{i,exp})^2}{\sigma_{i,\delta}^2}$ , where  $\langle \delta_{i,sim} \rangle$  is the average chemical shift for residue  $i$  from the simulations,  $\delta_{i,exp}$  is the chemical shift for residue  $i$  from the experiments, and  $\sigma_{i,\delta}$  is the combined RMS error from SPARTA+ for chemical shift  $\delta$ , and from residue  $i$  across five independent simulations. The combined RMS error was calculated using  $\sigma_{i,\delta} = \left( (\sigma_{i,\delta,sim})^2 + (\sigma_{\delta,SPARTA+})^2 \right)^{1/2}$ . The RMS errors for SPARTA+ are  $\sigma_{CA,SPARTA+}=0.92$  ppm,  $\sigma_{CB,SPARTA+}=1.13$  ppm,  $\sigma_{CO,SPARTA+}=1.07$  ppm,  $\sigma_{N,SPARTA+}=2.45$  ppm, and  $\sigma_{H,SPARTA+}=0.49$  ppm.  $\chi^2_{\delta} \leq 1$  implies agreement between the simulation and experimental results within  $\sigma_{i,\delta}$ . All simulation derived chemical shifts, except CA, are within or approximately within error of the experimental chemical shifts when all the residues are considered (All residues). The agreement between the simulations and the experiments improves for CA, CB, and CO when the experimental chemical shifts that are greater than one standard deviation from the average BMRB chemical shift for a given residue are removed (|Z-score| $\leq$ 1). Finally, we also removed the residues that show high helicity in the C-terminus of Httex1 in the simulations as a result of using the protonated version of His (|Z-score| $\leq$ 1, no C-term). Removal of these residues leads to all the simulation derived chemical shifts being within error or approximately within error of the experimental chemical shifts.

**Table S4.** Summary of proteomics analyses for interactors of soluble Httex1-GFP in Neuro2a cells using label-free quantitation. (*Attached as a separate Microsoft Xcel file*).

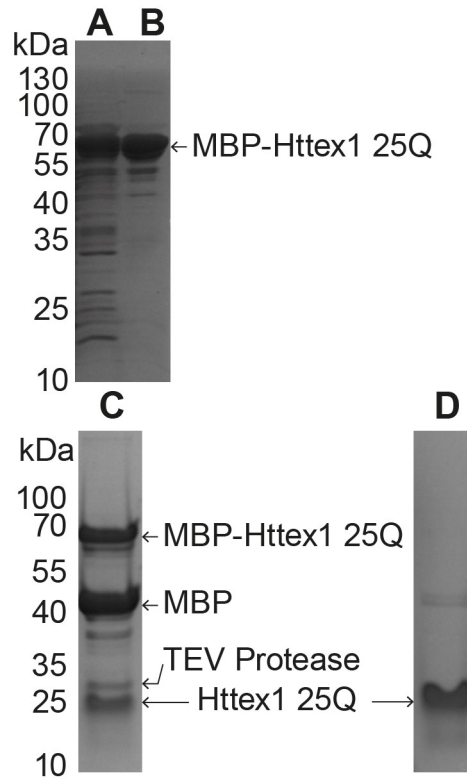

**Fig S1. Purification of Httex1 from MBP tagged Httex1 after TEV protease treatment.** Coomassie stained gels showing purification steps of Httex1 25Q. (A) Purification steps of MBP-Httex1 using a HisTrap column followed by (B) an MBPTrap column run on a Tris-Glycine 12% polyacrylamide gel. (C) 8-12% Tris-Tricine gel of TEV protease treated fusion protein and (D) after filtration of the cleavage reactants via a HisTrap column.

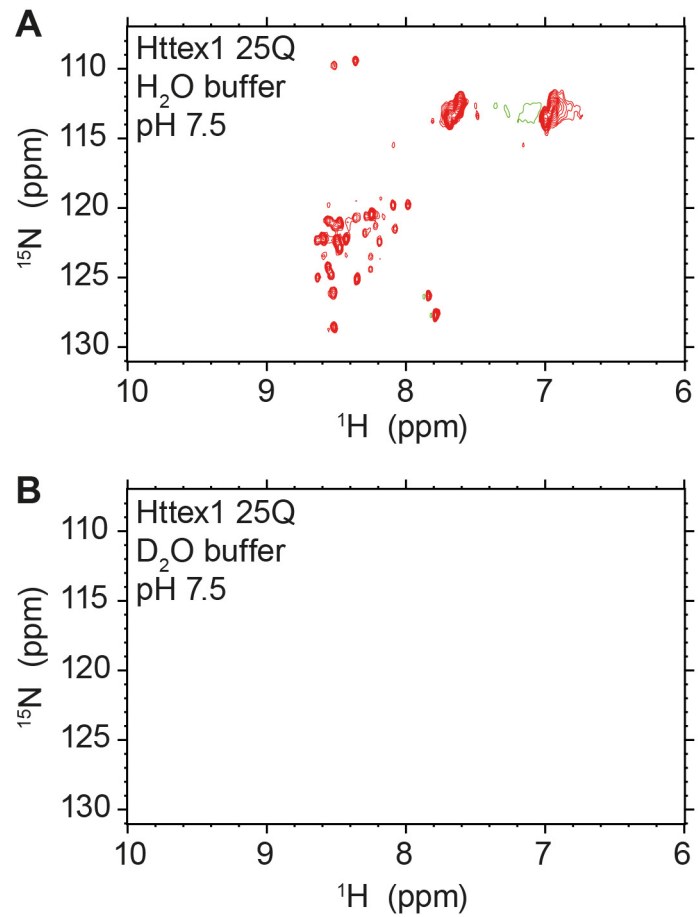

**Fig S2.** (A) Httex1 25Q 2D HSQC taken in low salt buffer (20 mM Tris-HCl, 100 mM NaCl, pH 7.5) at 5 °C and (B) in deuterated buffer.

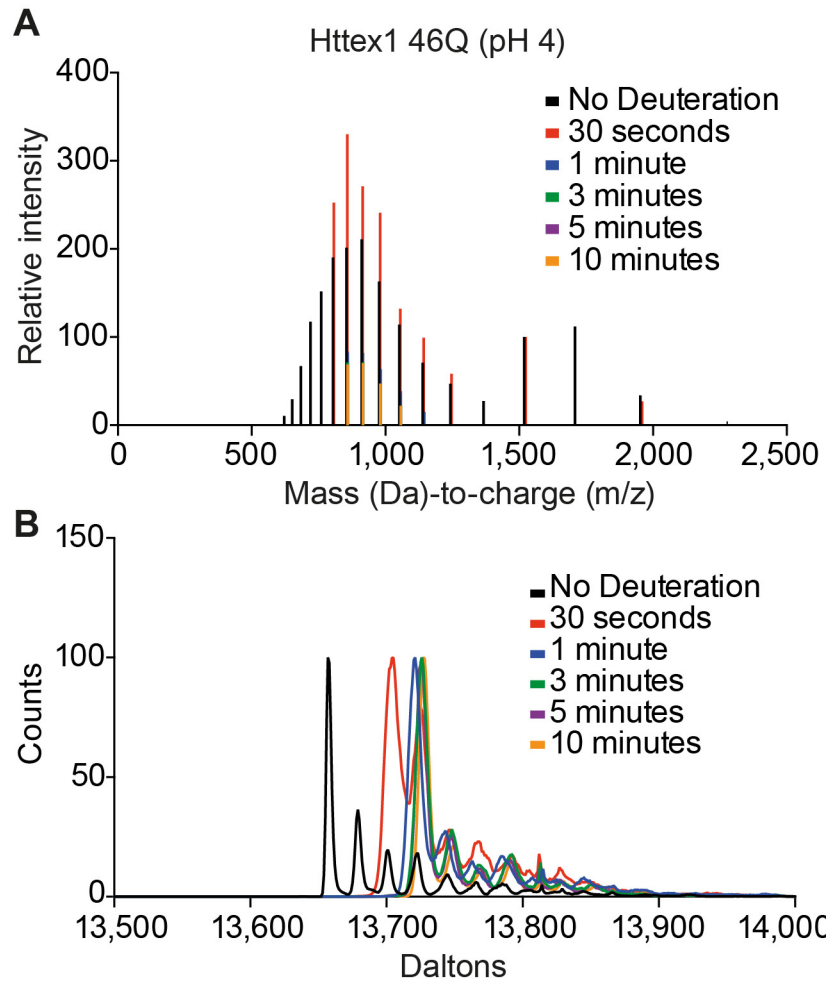

**Fig S3.** (A) Mass spectra of Httex1 46Q in sodium acetate buffer (150 mM, pH 4), following deuteriation at different time points. (B) The corresponding deconvoluted mass data of the data in panel A.



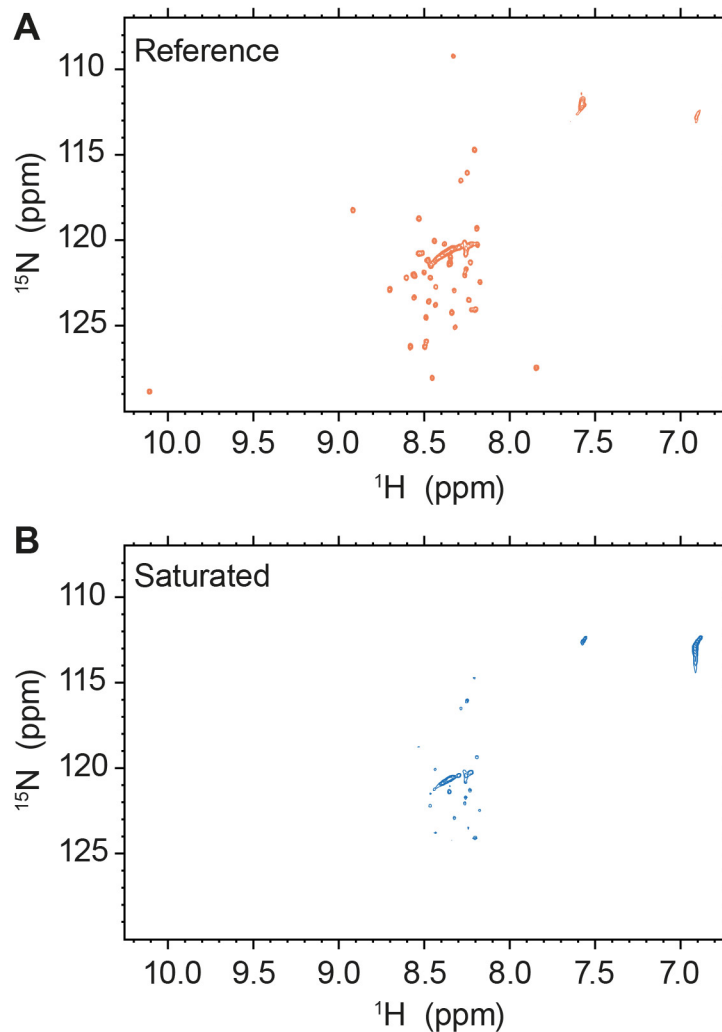

**Fig S4.** (A)  $^{15}\text{N}\{^1\text{H}\}$ -NOE reference spectra and (B) saturated 2D HSQC spectra for Httex1 25Q taken in sodium acetate buffer (150 mM, pH 4) at 5 °C.

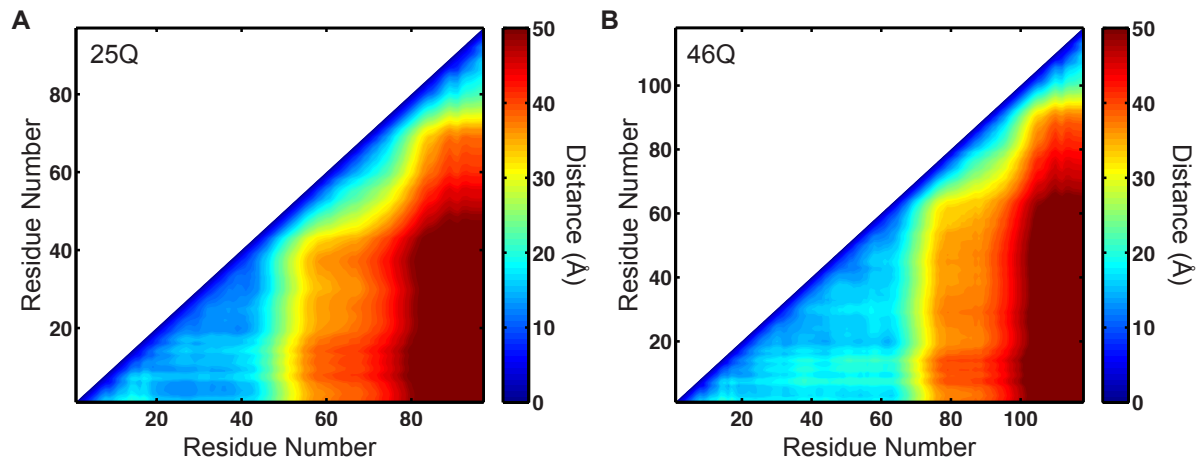

**Fig S5. Distance maps from ensembles of Httex1 25Q (A) and 46Q (B).** Distance maps quantify the average distance between two residues within the sequence. The shorter the average distance between two residues the cooler the color.

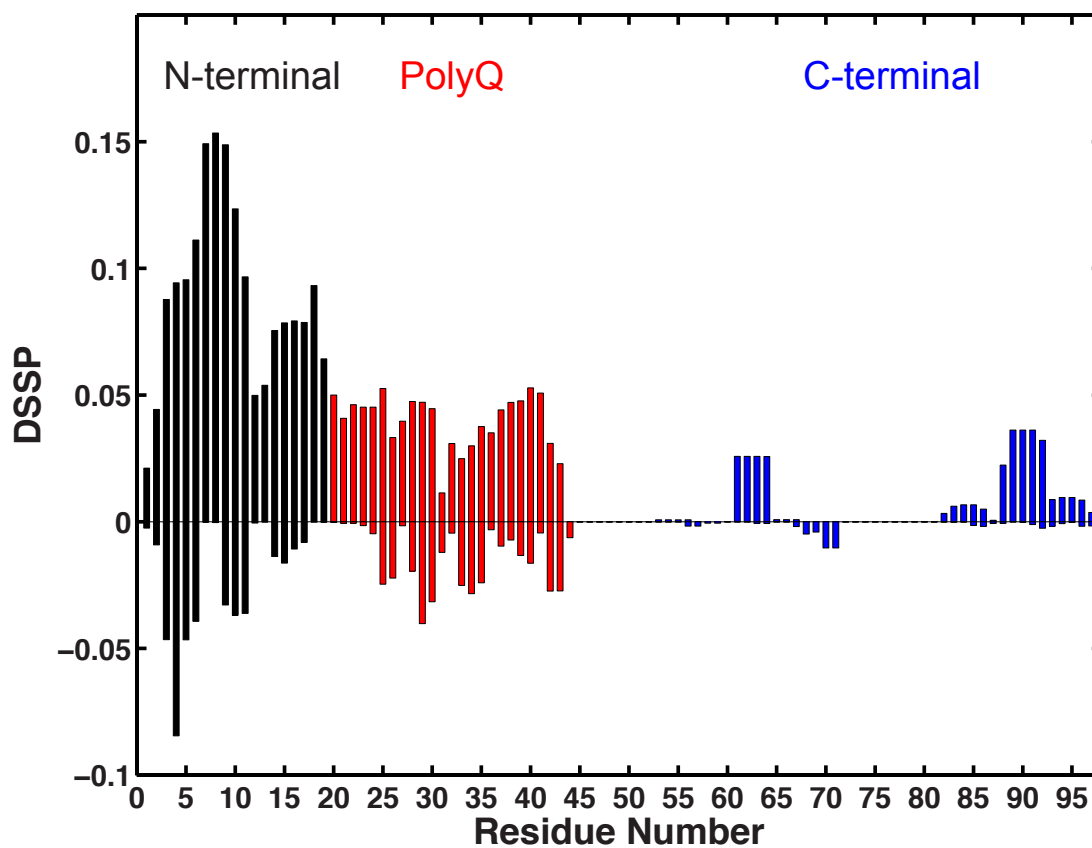

**Fig S6. Secondary structure propensities from ensembles of 25Q Httex1 with deprotonated histidine.** Probability a residue is found in an  $\alpha$ -helical stretch of length  $\geq 4$  residues (positive) or an extended stretch of  $\geq 2$  residues (negative) as defined by the DSSP algorithm. Domains are colored coded as shown.

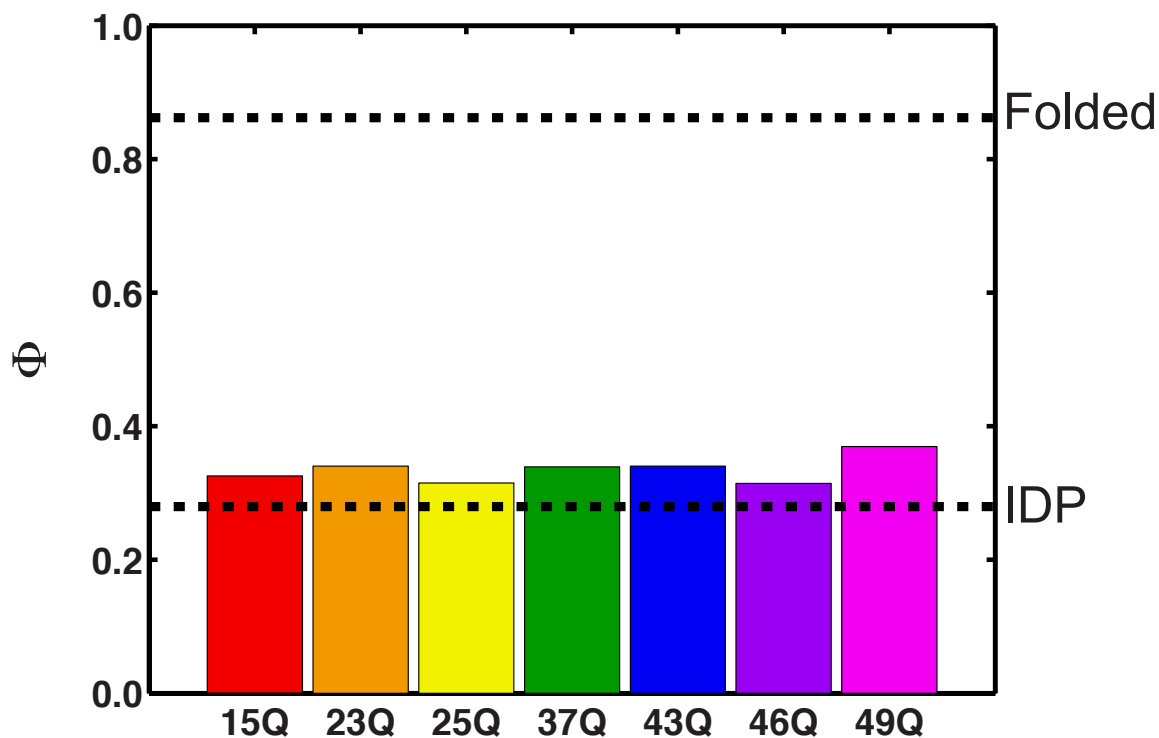

**Fig S7. The degree of similarity,  $\Phi$ , between simulated ensembles calculated over the C-terminal domain of Httex1 for all polyQ lengths.** Here, frames in which any residue C-terminal to P<sub>11</sub> was within 8 Å from any residue within the polyQ domain were filtered out for Httex1 25Q and 46Q. This filtering was used to mimic the observation that in the smFRET reweighted ensembles (15Q, 23Q, 37Q, 43Q, and 49Q) conformations in which the C-terminus interacts with the polyQ domain are down-weighted. Upon filtering, the 25Q and 46Q ensembles are less heterogeneous and more consistent with the other Httex1 constructs (compare with Fig 6c). Low  $\Phi$  values correspond to high degrees of heterogeneity within the simulated ensembles. The upper dashed line corresponds to the  $\Phi$ -value associated with a reference folded protein (Ntl9), whereas the lower dashed line corresponds to the  $\Phi$ -value associated with a reference IDP (Ash1).
